# Supplementary material for: Phytoremediation of Secondary Salinity in Greenhouse Soil with Astragalus sinicus, Spinacea oleracea and Lolium perenne
Source: MDPI journal article supplement (doi:10.3390/agriculture12020212), 2022-02-01
Supplement: s1 [file s1]

## Supplementary data

### **Vegetative remediation mitigates secondary salinization of cultivation facility soil via crop nutrient absorption and regulation of soil microbial communities**

Shumei Cai<sup>a</sup>, Sixin Xu<sup>a</sup>, Deshan Zhang<sup>a</sup>, Zishi Fu<sup>a</sup>, Hanlin Zhang<sup>a,\*</sup> & Haitao Zhu<sup>a,\*</sup>

\*Corresponding Author:

Hanlin Zhang, S Institute of Eco-Environment Protection, Shanghai Academy of Agricultural Sciences, 1000 Jinqi Road, Shanghai 201403, P. R. China, Email: zhanghanlinchick@163.com;

Haitao Zhu, Institute of Eco-Environment Protection, Shanghai Academy of Agricultural Sciences, 1000 Jinqi Road, Shanghai 201403, P. R. China, Email: htzhu123@163.com.

#### **CONTENTS**

**Fig. S1** qPCR standard curve for the 16S rRNA gene

**Fig. S2** qPCR amplification curve for the 16S rRNA gene

**Fig. S3** qPCR standard curve for the ITS gene

**Fig. S4** qPCR amplification curve for the ITS gene

**Fig. S5** Shoot and root nutrient contents of the three different crop species (\*\* denotes statistically significant differences between crop varieties ( $P < 0.01$ , Duncan's test). The box plots show the medians, 25th and 75th percentiles. The whiskers extend to 1.5 times the interquartile range. CK, control; CM, Chinese milk vetch; SP, spinach; RY, ryegrass.)

**Fig. S6** Correlations (Pearson's  $P$ -value) between crop nutrient accumulation and soil microbial abundance for Chinese milk vetch (A, B); spinach (C, D) and ryegrass (E, F). The shaded areas indicate the 95% confidence ranges derived from the models.

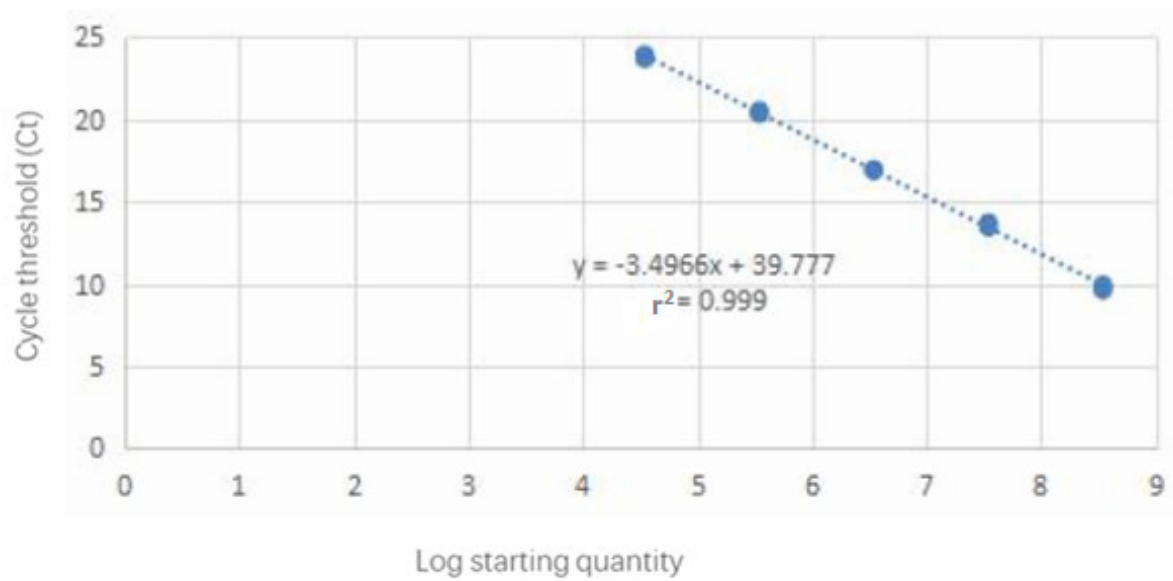

**Figure S1. qPCR standard curve of 16S rRNA genes**

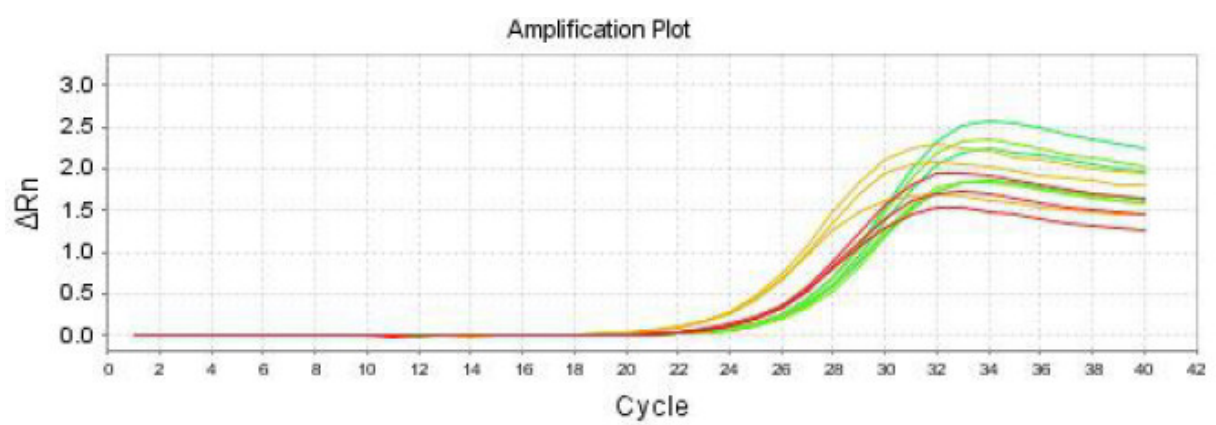

**Figure S2. qPCR amplification curve of 16S rRNA genes**

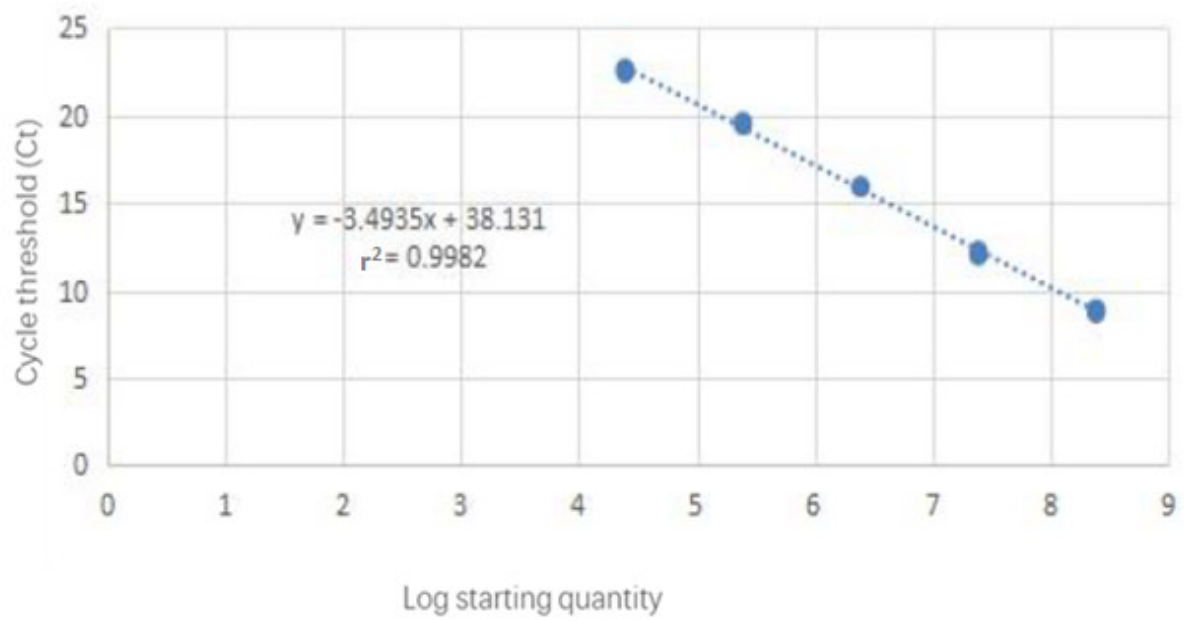

**Figure S3. qPCR standard curve of ITS genes**

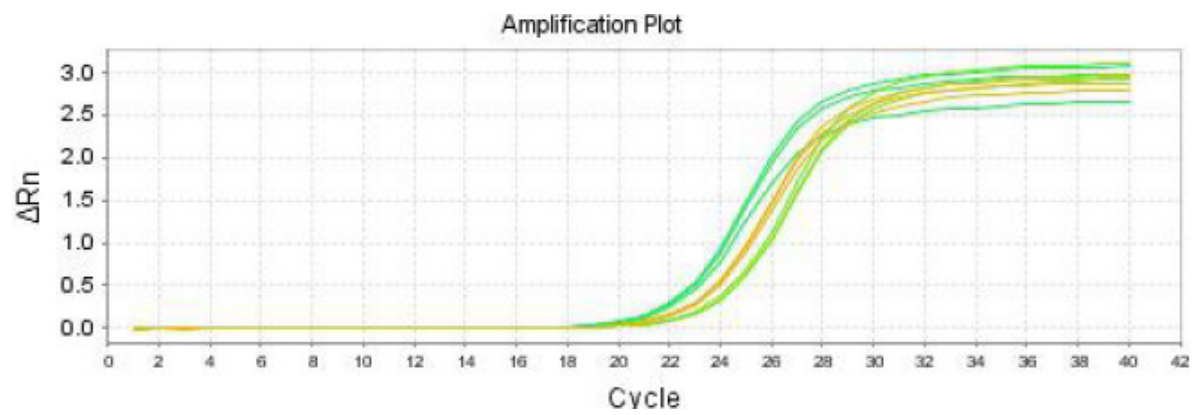

**Figure S4. qPCR amplification curve of ITS genes**

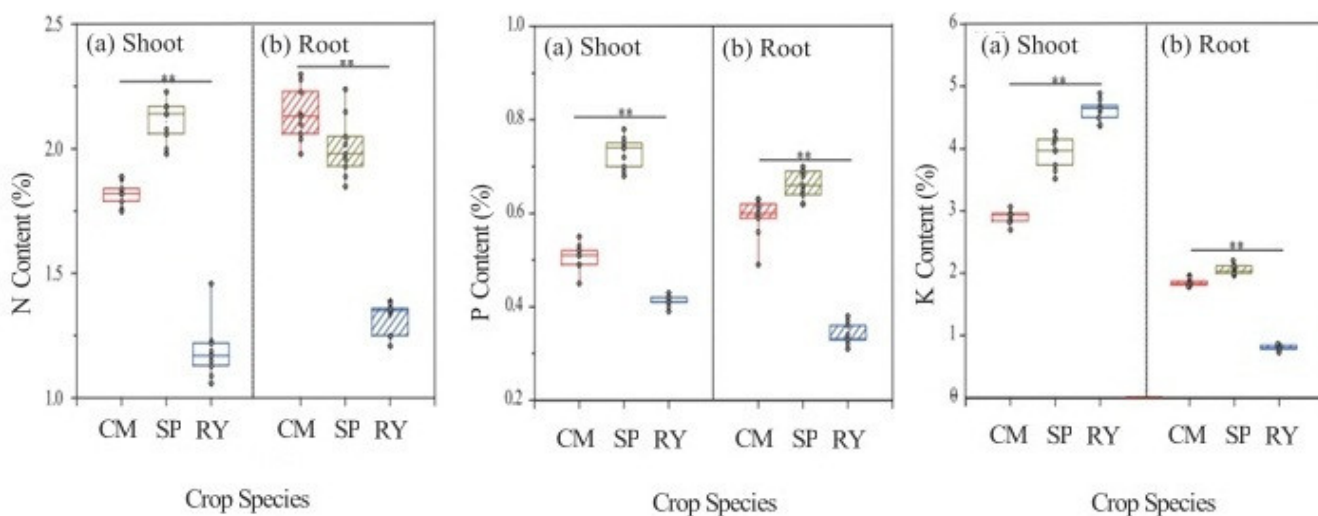

**Figure S5. Shoot and root nutrient contents of the three different crop species**

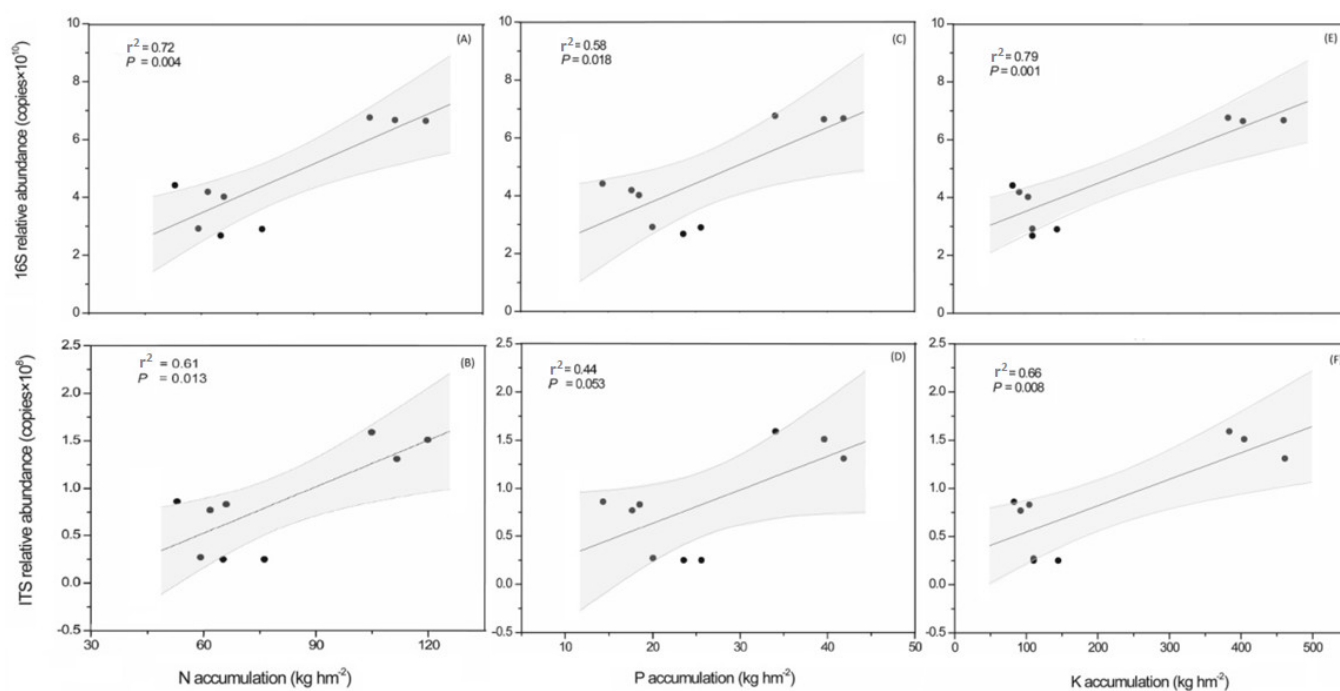

**Figure S6. Correlations (Pearson's P-value) between crop nutrient accumulation and soil microbial abundance for Chinese milk vetch (A, B); spinach (C, D) and ryegrass (E, F)**

**Table S1. Biomass accumulation and root-to-shoot ratio of the bioremediation crops**

|           | aboveground                           |                                       | belowground                           |                                       | root-shoot ratio |             |
|-----------|---------------------------------------|---------------------------------------|---------------------------------------|---------------------------------------|------------------|-------------|
|           | fresh biomass                         | dry biomass                           | fresh biomass                         | dry biomass                           | fresh biomass    | dry biomass |
|           | ( $\times 10^3$ kg hm <sup>-2</sup> ) |                  |             |
| <b>CM</b> | 29.70c                                | 3.07b                                 | 1.30b                                 | 0.20b                                 | 0.044a           | 0.064b      |
| <b>SP</b> | 33.63b                                | 2.93b                                 | 1.18b                                 | 0.19b                                 | 0.035a           | 0.066b      |
| <b>RY</b> | 80.00a                                | 8.93a                                 | 4.98a                                 | 0.49a                                 | 0.062a           | 0.055a      |

**Table S2. Bacterial (16S rRNA) and fungal (ITS)  $\alpha$ -diversity in soil samples**

| Treatments | 16S rRNA |         |          |          | ITS     |         |          |         |
|------------|----------|---------|----------|----------|---------|---------|----------|---------|
|            | Shannon  | Simpson | ACE      | Chao1    | Shannon | Simpson | ACE      | Chao1   |
| CK         | 6.36c    | 0.005a  | 2413.40c | 2429.24b | 2.58b   | 0.17b   | 198.41c  | 195.45c |
| CM         | 6.73a    | 0.003c  | 2703.31a | 2715.60a | 2.54b   | 0.19a   | 249.50a  | 249.20a |
| SP         | 6.56b    | 0.004b  | 2653.81b | 2638.42a | 2.66b   | 0.18b   | 224.17b  | 220.24b |
| RY         | 6.56b    | 0.005a  | 2712.96a | 2714.70a | 3.03a   | 0.09c   | 236.92ab | 243.88a |

Note: CK, control; CM, Chinese milk vetch; SP, spinach; RY, ryegrass. Different letters in the same column indicate a significant difference between treatments at the 0.05 level (n = 3).
