# Supplementary material for: Phytoremediation of Secondary Salinity in Greenhouse Soil with Astragalus sinicus, Spinacea oleracea and Lolium perenne
Source: MDPI journal article supplement (doi:10.3390/agriculture12020212), 2022-02-01
Supplement: s1 [file s1]

Archive with 1 entries (1 files):
- agriculture-1542977-supplementary.pdf
